# Supplementary material
Source: PubMed Central journal article supplement (PMC4342728)
Supplement: nn504905q_si_001.pdf [file nn504905q_si_001.pdf]

## Supporting Information

### **Polymeric Nanoparticles for Non-Viral Gene Therapy Extend Brain Tumor Survival *In Vivo***

**Antonella Mangraviti<sup>1,#</sup>, Stephany Yi Tzeng<sup>2,3,#</sup>, Kristen Lynn Kozielski<sup>2,3,#</sup>, Yuan Wang<sup>1,7,#</sup>, Yike Jin<sup>1</sup>, David Gullotti<sup>1</sup>, Mariangela Pedone<sup>1</sup>, Nitsa Buaron<sup>1,8</sup>, Ann Liu<sup>1</sup>, David R. Wilson<sup>2,3</sup>, Sarah K. Hansen<sup>2,3</sup>, Fausto J. Rodriguez<sup>9</sup>, Guo-Dong Gao<sup>7</sup>, Francesco DiMeco<sup>1,10</sup>, Henry Brem<sup>1,2,4,5</sup>, Alessandro Olivi<sup>1,5</sup>, Betty Tyler<sup>1,\*</sup>, Jordan J. Green<sup>1,2,3,4,6,\*</sup>**

<sup>1</sup> Department of Neurosurgery, Johns Hopkins University School of Medicine, Baltimore, MD

<sup>2</sup> Department of Biomedical Engineering, Johns Hopkins University School of Medicine, Baltimore, MD

<sup>3</sup> The Institute for Nanobiotechnology and the Translational Tissue Engineering Center, Johns Hopkins University School of Medicine, Baltimore, MD

<sup>4</sup> Department of Ophthalmology, Johns Hopkins University School of Medicine, Baltimore, MD

<sup>5</sup> Department of Oncology, Johns Hopkins University School of Medicine, Baltimore, MD.

<sup>6</sup> Department of Material Science and Engineering, Johns Hopkins University, Baltimore, MD.

<sup>7</sup> Department of Neurosurgery, Tangdu Hospital, The Fourth Military Medical University, Xi'an, China

<sup>8</sup> Department of Chemical Engineering, Ben Gurion University of the Negev, Be'er Sheva, Israel

<sup>9</sup> Department of Pathology, Johns Hopkins University School of Medicine, Baltimore, MD

<sup>10</sup> Department of Neurosurgery, Fondazione IRCCS Istituto Neurologico C. Besta, Milan, Italy

# These authors contributed equally

\* Address correspondence to

[btyler@jhmi.edu](mailto:btyler@jhmi.edu)

[green@jhu.edu](mailto:green@jhu.edu)

| <b>Polymer</b> | <b>B:S ratio</b> | <b>M<sub>N</sub></b> | <b>M<sub>W</sub></b> | <b>PDI</b> |
|----------------|------------------|----------------------|----------------------|------------|
| 446            | 1.1:1            | 3342                 | 6398                 | 1.91       |
| 447            | 1.1:1            | 11345                | 36814                | 3.25       |
| 453            | 1.2:1            | 13719                | 110715               | 8.07       |
| 456            | 1.2:1            | 4208                 | 7411                 | 1.76       |
| 457            | 1.1:1            | 16005                | 62522                | 3.91       |
| 536            | 1.1:1            | 4876                 | 8468                 | 1.74       |
| 537            | 1.05:1           | 14899                | 35287                | 2.37       |

**Table S1.** Gel permeation chromatography (GPC) results of all polymers indicating the number average ( $M_N$ ) and weight average ( $M_W$ ) molecular weight and polydispersity (PDI) of each polymer.

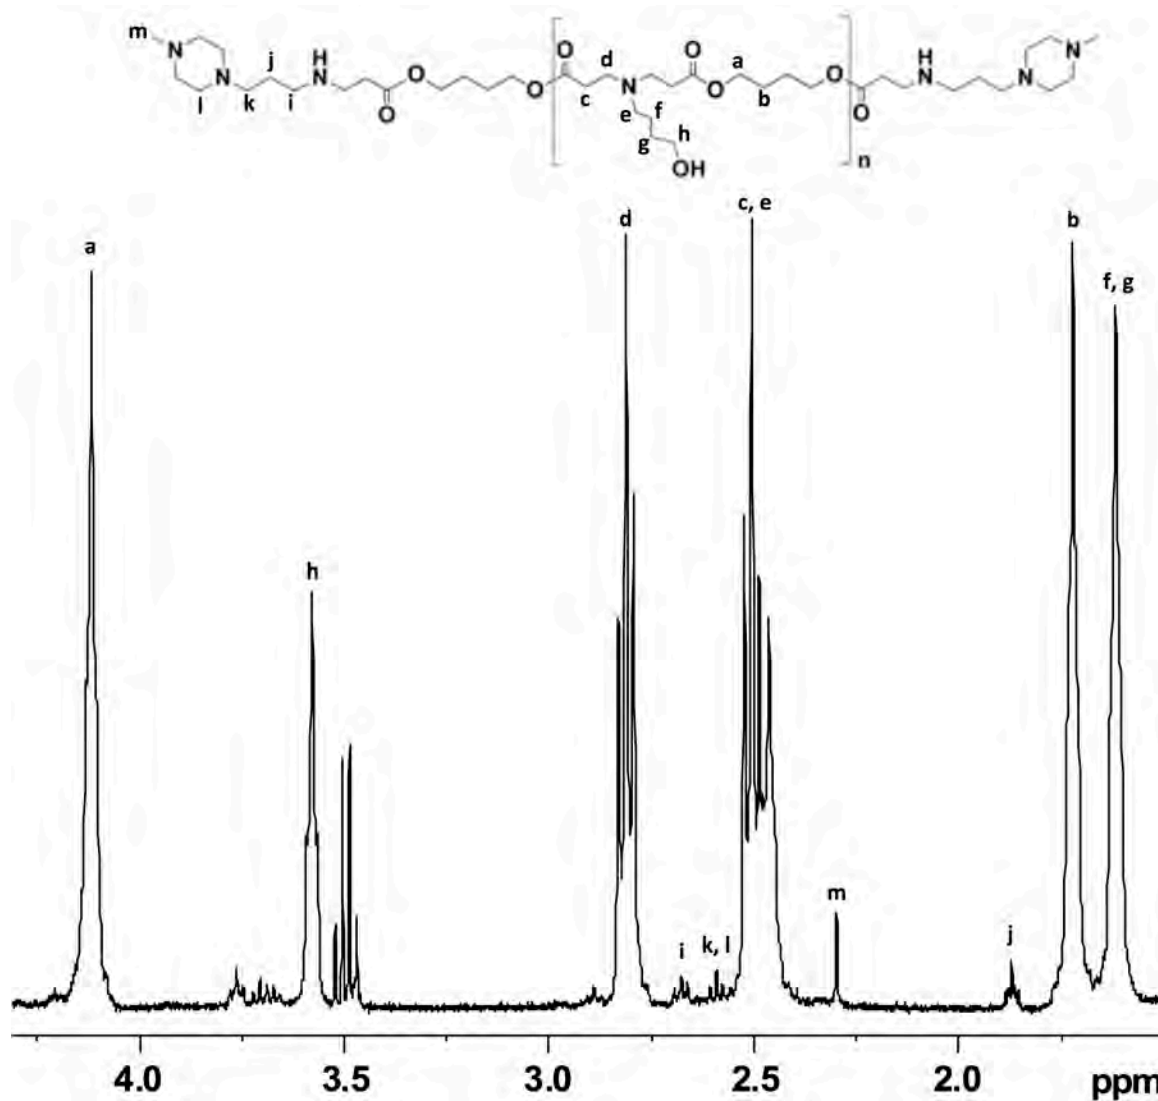

**Figure S1.** <sup>1</sup>H-NMR spectrum of polymer 447 (CDCl<sub>3</sub>, 400 Hz). Protons peaks are labeled with letters corresponding to protons along the structure of 447.

|            | 9L Gliosarcoma |             | F98 Glioma  |             |
|------------|----------------|-------------|-------------|-------------|
|            | Lipo 0.6 µg    | Lipo 0.3 µg | Lipo 0.6 µg | Lipo 0.3 µg |
| 446 30 w/w | ***            | ***         | ***         | ***         |
| 446 60 w/w | ***            | ***         | **          | ns          |
| 446 90 w/w | ***            | ***         | ns          | ns          |
| 447 30 w/w | ***            | ***         | ***         | ***         |
| 447 60 w/w | ns             | ns          | ***         | ***         |
| 447 90 w/w | **             | ns          | ***         | ***         |
| 453 30 w/w | ***            | ***         | ***         | ***         |
| 453 60 w/w | *              | ***         | ***         | ***         |
| 453 90 w/w | ns             | ***         | ns          | *           |
| 456 30 w/w | ***            | ***         | ns          | ns          |
| 456 60 w/w | ns             | *           | ***         | ***         |
| 456 90 w/w | ns             | ns          | ***         | ***         |
| 457 30 w/w | ***            | ***         | ***         | ***         |
| 457 60 w/w | ns             | ns          | ***         | ***         |
| 457 90 w/w | ns             | ns          | ***         | ***         |
| 536 30 w/w | ***            | ***         | ns          | ns          |
| 536 60 w/w | ns             | ns          | ***         | ***         |
| 536 90 w/w | *              | ns          | ***         | ***         |
| 537 30 w/w | ***            | ***         | ***         | ***         |
| 537 60 w/w | ns             | ns          | ***         | ***         |
| 537 90 w/w | ns             | ns          | *           | **          |

**Table S2.** Results of one-way ANOVA with Dunnett's post-test in 9L and F98 cells versus Lipofectamine® 2000 delivering either 0.6 or 0.3 µg GFP DNA per well. (ns = not significant, \* =  $p < 0.05$ , \*\* =  $p < 0.01$ , \*\*\* =  $p < 0.001$ )

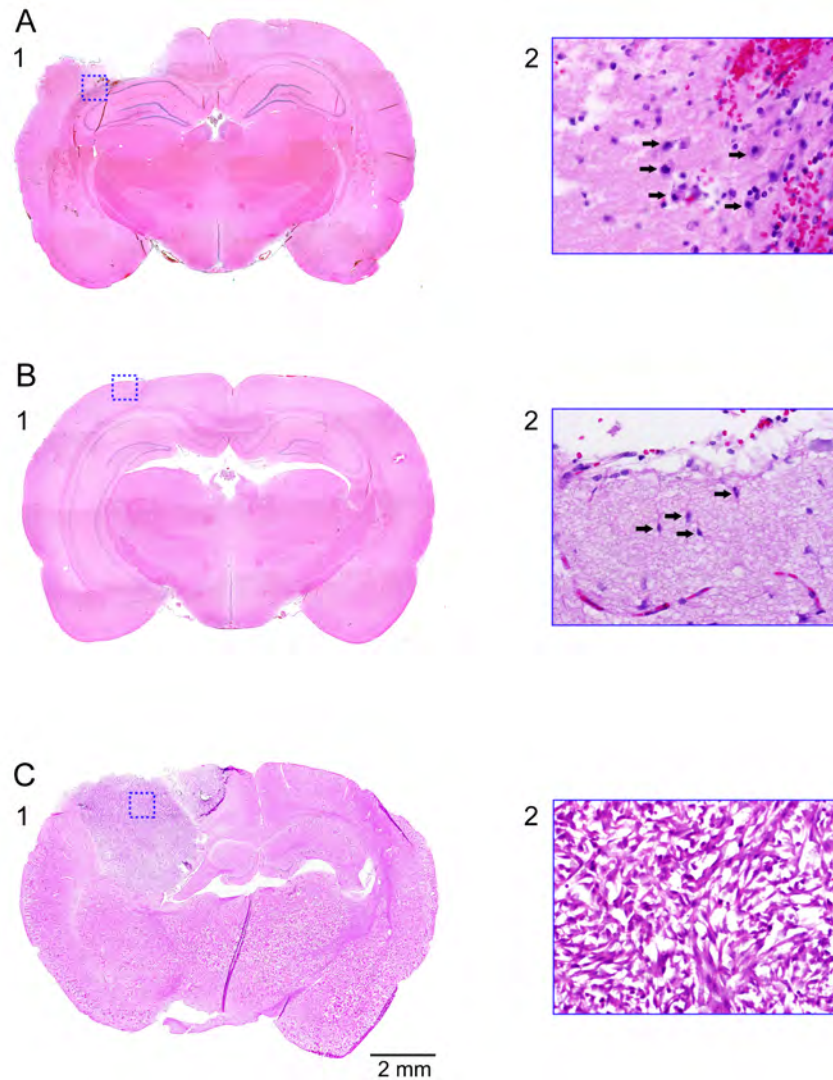

**Figure S2.** Safety of local brain delivery of PBAE nanoparticles.

Representative coronal sections of rat brains from wild type and 9L tumor-bearing animals infused with PBAE/GFP nanoparticles. The H&E images taken within 1 mm around the site of the infusion show no sign of neuropathological damage.

**(A1)** Wild type animal euthanized 3 days post-nanoparticle infusion. The image shows indentation into the cortex with inflammation, consistent with acute injury at the injection site. No sign of neurotoxicity. Under microscopic view: presence of neutrophils with a few macrophages within the injection site (black arrows) **(A2)**.

**(B)** Wild type animal euthanized 60 days post-nanoparticle infusion. The figure shows a very small indentation with tissue shrinkage. Under microscopic view: astrocytes are present (black arrows), and the tissue shows no sign of inflammation **(B2)**.

**(C)** 9L tumor-bearing animal euthanized 3 days post-PBAE/GFP nanoparticle infusion. The image shows a tumor mass causing contralateral brain midline shift and robust mass effect on the surrounding structures. There is a distinguishable sign of needle entrance within the tumor mass. Under microscopic view: characteristic cellular density of tumor tissue and no inflammation or tissue damage referable to any cause of damage other than tumor **(C2)**.

**(A2,B2,C2, X 600 magnification)**

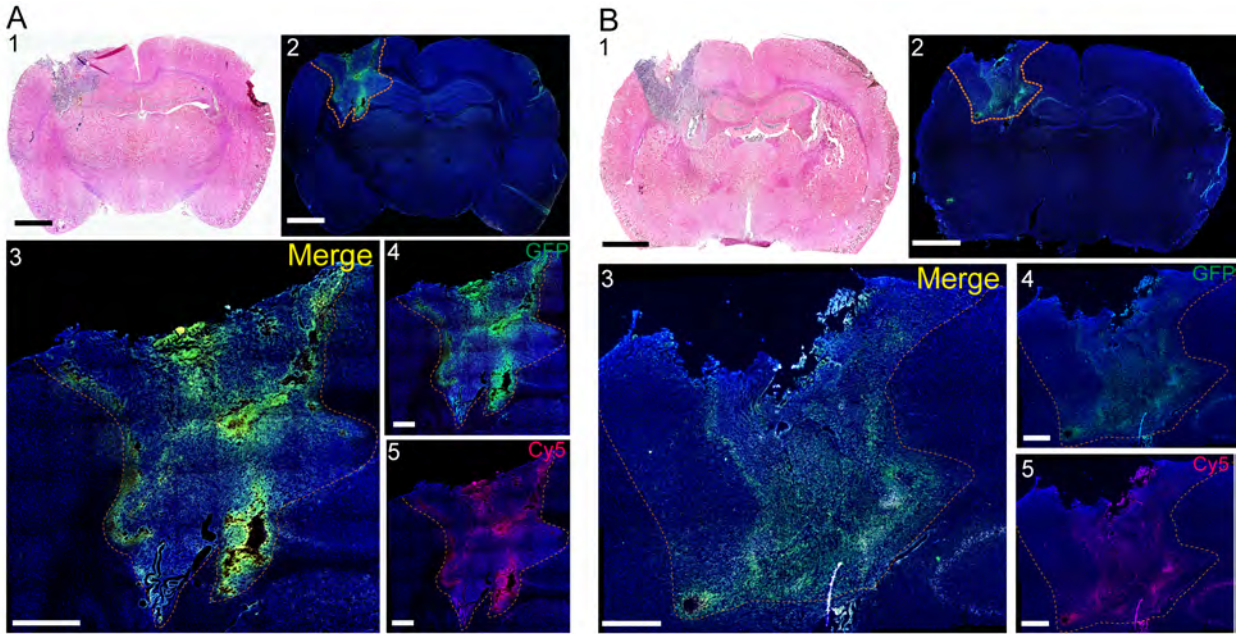

**Figure S3.** Convection-enhanced delivery of PBAE/GFP nanoparticles improves the level of intratumoral transfection. Coronal section of 9L-bearing rats infused via CED (**A**) and injected with bolus administration (**B**). Fluorescence microscopy of both brains show higher intratumoral transfection efficacy after CED infusion (**A2**, **B2**, scale bar=2mm). The images focused on the tumor area show a distribution of Cy5 and GFP signal that is favorable in CED compared to bolus (**A3-5**, **B3-5** scale bar=1 mm). Red: Cy5, green: GFP, blue: DAPI.
